# Supplementary material for: Meta-topologies define distinct anatomical classes of brain tumors linked to histology and survival
Source: bioRxiv or medRxiv preprint supplement (doi:10.1101/2021.11.20.21266624), 2021-11-21
Supplement: Supplementary file [file media-1.pdf]

## Supplemental Material

### Meta-topologies define distinct anatomical classes of brain tumors linked to histology and survival

Julius M. Kernbach<sup>1,2,3\*</sup>, Daniel Delev<sup>1,2,3\*</sup>, Georg Neuloh<sup>2,3</sup>, Hans Clusmann<sup>2,3</sup>,  
Danilo Bzdok<sup>4,5</sup>, Simon B. Eickhoff<sup>6,7</sup>, Victor E. Staartjes<sup>8</sup>, Flavio Vasella<sup>8</sup>,  
Michael Weller<sup>9</sup>, Luca Regli<sup>8</sup>, Carlo Serra<sup>8</sup>, Niklaus Krayenbühl<sup>8,10</sup>, Kevin Akeret<sup>8</sup>

<sup>1</sup> Neurosurgical Artificial Intelligence Laboratory Aachen (NAILA), RWTH Aachen University Hospital, Aachen, Germany

<sup>2</sup> Department of Neurosurgery, Faculty of Medicine, RWTH Aachen University, Aachen, Germany

<sup>3</sup> Center for Integrated Oncology, Universities Aachen, Bonn, Cologne, Düsseldorf (CIO ABCD), Germany.

<sup>4</sup> Department of Biomedical Engineering, McConnell Brain Imaging Centre, Montreal Neurological Institute, Faculty of Medicine, School of Computer Science, McGill University, Montreal, Canada

<sup>5</sup> Mila - Quebec Artificial Intelligence Institute, Montreal, Canada

<sup>6</sup> Institute of Neuroscience and Medicine (INM-7), Research Centre Jülich, Jülich, Germany.

<sup>7</sup> Institute of Systems Neuroscience, Medical Faculty, Heinrich Heine University Düsseldorf, Düsseldorf, Germany.

<sup>8</sup> Department of Neurosurgery, Clinical Neuroscience Center, University Hospital and University of Zurich, Zurich, Switzerland

<sup>9</sup> Department of Neurology, Clinical Neuroscience Center, University Hospital and University of Zurich, Zurich, Switzerland

<sup>10</sup> Division of Pediatric Neurosurgery, University Children's Hospital, Zurich, Switzerland

\* shared

*Running title:* Brain tumor meta-topologies

*Corresponding author:*

Kevin Akeret, MD

Department of Neurosurgery, Clinical Neuroscience Center

University Hospital and University of Zurich

Frauenklinikstrasse 10

CH-8091 Zurich, Switzerland

Telephone: +41 44 255 11 11

Email: kevin.akeret@usz.ch

ORCID: 0000-0002-5946-4999

## A Primary brain tumors

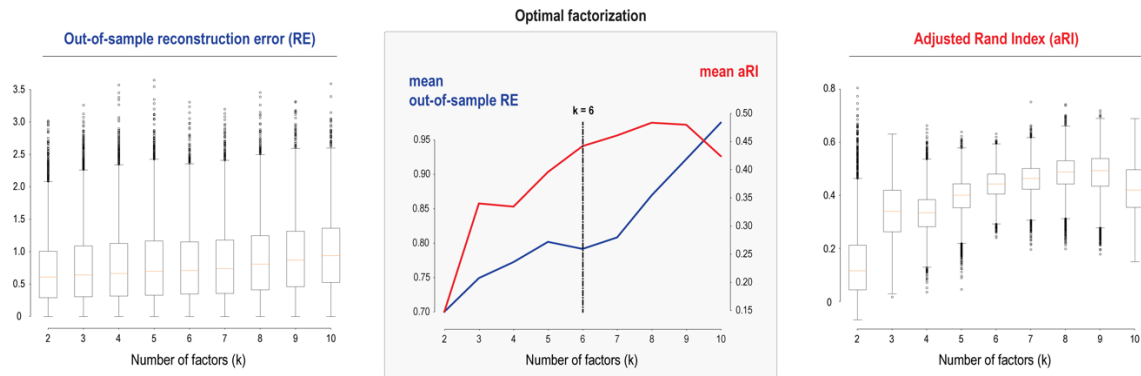

## B Brain metastases

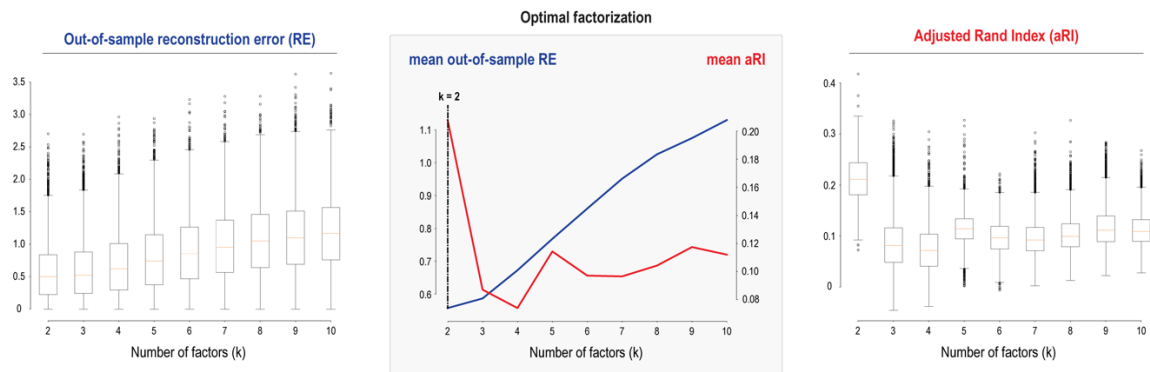

### Supplemental Figure 1. Optimal factorizations in primary and secondary brain tumors

Quantitative evaluation of different non-negative matrix factorization (NNMF) solutions with  $k$  number of factors assessed in 10,000 bootstrapped split-half analyses by the out-of-sample increase in the reconstruction error (RE) and the adjusted Rand Index (aRI). Lower values for the out-of-sample increase in RE indicate better generalizability. Higher values of aRI indicate higher stability. **A** The optimal factorization in primary brain tumors resulted in  $k=6$  meta-topologies. **B** The optimal factorization in brain metastases yielded  $k=2$  meta-topologies.

A Primary brain tumors

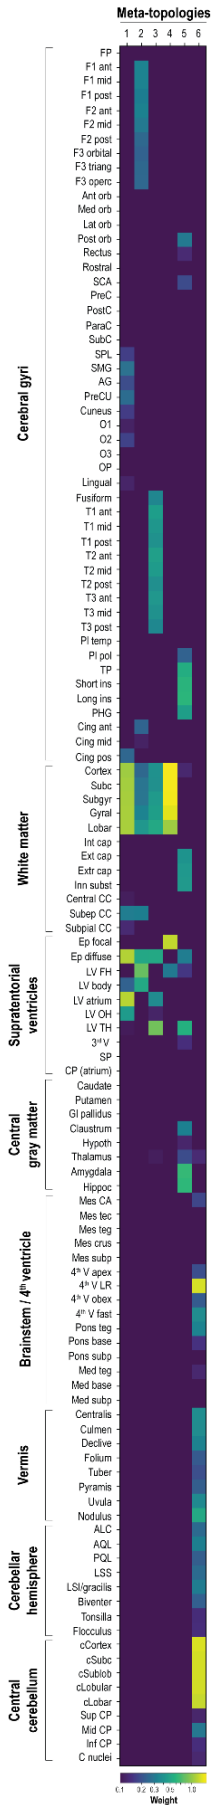

B Brain metastases

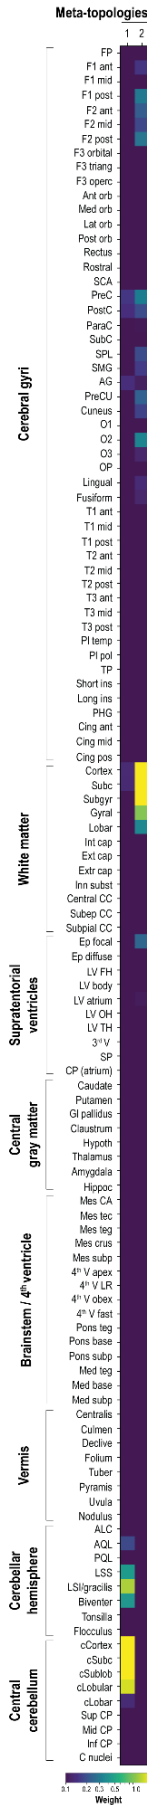

## Supplemental Figure 2. Detailed anatomy of primary and secondary brain tumor meta-topologies

Supplement to Figure 1 and 2: Meta-topologies in primary brain tumors (A) and brain metastases (B) with their detailed underlying neuroanatomical distribution. *Abbreviations (in vertical descending order)*: FP, frontal pole; F1, superior frontal gyrus; ant, anterior third; mid, middle third; post, posterior third; F2, middle frontal gyrus; F3 inferior frontal gyrus; Ant/Med/Lat/Post orb, anterior/medial/lateral/posterior orbital gyrus; SCA, subcallosal area; PreC, precentral gyrus; PostC, postcentral gyrus; ParaC, paracentral lobule; SubC, subcentral gyrus; SPL, superior parietal lobule; SMG, supramarginal gyrus; AG, angular gyrus; PreCU, precuneus; O1, superior occipital gyrus; O2, middle occipital gyrus; O3, inferior occipital gyrus; OP, occipital pole; T1, superior temporal gyrus; T2, middle temporal gyrus; T3, inferior temporal gyrus; Pl temp, planum temporale; Pl pol, planum polare; TP, temporal pole; ins, insular gyri; PHG, parahippocampal gyrus; Cingulate, cingulate gyrus; SubC, subcortical white matter sector; Subgyr, subgyral white matter sector; Gyral, gyral white matter sector; Lobar, lobar white matter sector; Int cap, internal capsule; Ext cap, external capsule; Extr cap, extreme capsule; Inn subst, innominate substance; CC, corpus callosum; Subep, subependymal; Ep, ependyma; LV, lateral ventricle; FH, frontal horn; OH, occipital horn; 3<sup>rd</sup> V, third ventricle; SP, septum pellucidum; CP, choroid plexus; Gl, globus; Hypoth, hypothalamus; Hippoc, hippocampus; Mes, mesencephalon; CA, cerebral aqueduct (of Sylvius); tec, tectum; teg, tegmentum; subp, subpial; 4<sup>th</sup> V, fourth ventricle; LR, lateral recess; fast, fastigium; ALC, ala lobuli centralis; AQL, anterior quadrangular lobule; PQL, posterior quadrangular lobule; LSS, superior semilunar lobule; LSI, inferior semilunar lobule; cCortex, cerebellar cortex; sSubc, cerebellar subcortical white matter sector; cSublob, cerebellar sublobular white matter sector; cLobular, cerebellar lobular white matter sector; cLobar, cerebellar lobar white matter sector; CP, cerebellar peduncle; C nuclei, cerebellar nuclei.

### A Primary brain tumors

#### Meta-topologies

+ Parieto-occipital neopallial (1)  
 + Frontal neopallial (2)  
 + Temporal neopallial (3)  
+ Unisegmental (4)  
 + Allopalial (5)  
 + Infratentorial (6)

#### Primary brain tumors overall

| Time after surgery (d) | 0   | 1000 | 2000 | 3000 | 4000 |
|------------------------|-----|------|------|------|------|
| Number at risk         | 141 | 24   | 11   | 3    | 0    |
|                        | 115 | 34   | 13   | 3    | 0    |
|                        | 69  | 11   | 3    | 1    | 0    |
|                        | 179 | 78   | 42   | 8    | 0    |
|                        | 70  | 20   | 9    | 3    | 0    |
|                        | 72  | 42   | 23   | 8    | 0    |

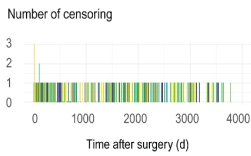

#### Glioblastoma

| Time after surgery (d) | 0   | 1000 | 2000 | 3000 | 4000 |
|------------------------|-----|------|------|------|------|
| Number at risk         | 121 | 13   | 3    | 1    | 0    |
|                        | 76  | 8    | 4    | 1    | 0    |
|                        | 59  | 7    | 1    | 0    | 0    |
|                        | 91  | 16   | 6    | 3    | 0    |
|                        | 27  | 1    | 0    | 0    | 0    |
|                        | 5   | 0    | 0    | 0    | 0    |

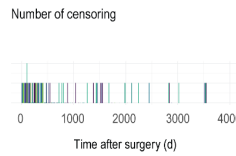

### B Brain metastases

#### Meta-topologies

+ Infratentorial (1)  
 + Supratentorial (2)

#### Brain metastases overall

| Time after surgery (d) | 0   | 1000 | 2000 | 3000 | 4000 |
|------------------------|-----|------|------|------|------|
| Number at risk         | 76  | 12   | 4    | 0    | 0    |
|                        | 214 | 45   | 13   | 1    | 0    |

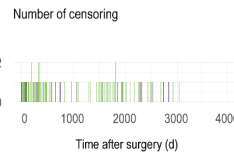

#### Lung cancer brain metastases

| Time after surgery (d) | 0  | 1000 | 2000 | 3000 | 4000 |
|------------------------|----|------|------|------|------|
| Number at risk         | 45 | 5    | 2    | 0    | 0    |
|                        | 96 | 20   | 5    | 0    | 0    |

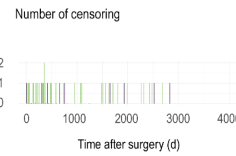

## Supplemental Figure 3. Risk tables and censoring events for the meta-topology-specific survival analyses

Supplement to the Kaplan-Meier curves shown in Figure 4 providing the risk for an event over time (number at risk) and the number of censoring events over time (number of censoring) stratified by the corresponding meta-topology of highest relevance. **A.** Primary brain tumors overall (left) and glioblastoma (right). *Abbreviations:* d, days. **B.** Brain metastases overall (left) and lung cancer brain metastases (right).

### Supplemental Table 1. Cohort characteristics

The demographic, histopathologic, and clinical characteristics of the study cohort. *Abbreviations:* DT, developmental tumors; EP, ependymoma; gIIG, WHO grade II glioma; gIIIG, WHO grade III glioma; GBM, glioblastoma; GIT, gastrointestinal tract (mouth, tonsil, parotid, esophagus, stomach, gallbladder, pancreas, colorectal cancer); MB, medulloblastoma; Misc., miscellaneous (cancer of unknown primary, adrenal, leukemia, sarcoma, mesothelial, thyroid); PA, pilocytic astrocytoma; UGT, urogenital tract (kidney, bladder; ovary, tube, uterus; testes, prostate).

\*based on immunohistochemistry or PCR

|                                     | Primary brain tumors |             |             |             |             |             |             |             |
|-------------------------------------|----------------------|-------------|-------------|-------------|-------------|-------------|-------------|-------------|
|                                     | Overall              | GBM         | gIIIG       | gIIG        | DT          | EP          | PA          | MB          |
| <b>n</b>                            | 646                  | 379         | 105         | 50          | 19          | 26          | 30          | 15          |
| <b>Sex (male)</b>                   | 402 (62.2)           | 244 (64.4)  | 63 (60.0)   | 31 (62.0)   | 12 (63.2)   | 14 (53.8)   | 21 (70.0)   | 9 (60.0)    |
| <b>Age (years)</b>                  | 50.1 (21.6)          | 60.8 (14.2) | 46.4 (15.7) | 43.1 (16.1) | 20.4 (15.7) | 24.6 (21.3) | 11.7 (10.4) | 16.6 (14.3) |
| <b>Karnofsky Performance Status</b> | 80.0 (12.6)          | 76.9 (13.2) | 84.1 (10.0) | 86.7 (9.9)  | 87.6 (8.3)  | 86.7 (11.4) | 82.9 (9.2)  | 83.0 (6.7)  |
| <b>Modified Rankin Scale</b>        | 1.7 (1.0)            | 1.9 (1.0)   | 1.4 (0.7)   | 1.2 (0.7)   | 1.1 (0.6)   | 1.3 (0.9)   | 1.5 (0.7)   | 1.5 (0.5)   |
| <b>Resection (vs. biopsy)</b>       | 510 (78.9)           | 285 (75.2)  | 81 (77.1)   | 37 (74.0)   | 19 (100.0)  | 24 (92.3)   | 30 (100.0)  | 14 (93.3)   |
| <b>Chemotherapy</b>                 | 428 (69.1)           | 269 (73.7)  | 89 (86.4)   | 35 (71.4)   | 0 (0.0)     | 13 (59.1)   | 2 (7.1)     | 14 (93.3)   |
| <b>Radiotherapy</b>                 | 473 (76.2)           | 311 (85.0)  | 91 (88.3)   | 29 (58.0)   | 2 (10.5)    | 17 (77.3)   | 0 (0.0)     | 15 (100.0)  |
| <b>MIB1</b>                         | 25.0 (20.6)          | 32.5 (19.2) | 18.7 (17.4) | 6.7 (4.8)   | 3.4 (4.4)   | 25.0 (24.4) | 3.8 (3.6)   | 38.3 (26.5) |
| <b>1p19q co-deletion</b>            | -                    | 2 (9.1)     | 19 (23.8)   | 21 (61.8)   | -           | -           | -           | -           |
| <b>IDH1 mutation*</b>               | -                    | 10 (3.4)    | 45 (51.1)   | 32 (72.7)   | -           | -           | -           | -           |
| <b>MGMT promoter methylation</b>    | -                    | 82 (38.0)   | 9 (45.0)    | 4 (57.1)    | -           | -           | -           | -           |
|                                     | Metastases           |             |             |             |             |             |             |             |
|                                     | Overall              | Lung        | Skin        | GIT         | Breast      | UGT         | Misc.       |             |
| <b>n</b>                            | 290                  | 141         | 44          | 37          | 27          | 24          | 17          |             |
| <b>Gender (m)</b>                   | 149 (51.4)           | 77 (54.6)   | 24 (54.5)   | 24 (64.9)   | 1 (3.7)     | 16 (66.7)   | 7 (41.2)    |             |
| <b>Age (years)</b>                  | 60.7 (11.9)          | 61.4 (9.9)  | 58.4 (13.6) | 65.6 (10.3) | 58.4 (12.5) | 56.2 (18.3) | 60.4 (10.3) |             |
| <b>Karnofsky Performance Status</b> | 76.9 (11.6)          | 77.7 (11.0) | 79.8 (11.1) | 74.1 (10.4) | 77.8 (11.5) | 71.2 (15.1) | 75.9 (12.3) |             |
| <b>Modified Rankin Scale</b>        | 2.0 (0.9)            | 1.9 (0.8)   | 1.8 (1.0)   | 2.2 (0.8)   | 1.9 (0.8)   | 2.4 (1.0)   | 1.9 (1.0)   |             |
| <b>Resection (vs. biopsy)</b>       | 277 (95.5)           | 136 (96.5)  | 43 (97.7)   | 36 (97.3)   | 27 (100.0)  | 23 (95.8)   | 12 (70.6)   |             |
| <b>Chemotherapy</b>                 | 175 (62.3)           | 94 (69.1)   | 34 (77.3)   | 12 (33.3)   | 17 (65.4)   | 10 (41.7)   | 8 (53.3)    |             |
| <b>Radiotherapy</b>                 | 255 (89.2)           | 128 (92.1)  | 42 (95.5)   | 31 (83.8)   | 25 (92.6)   | 18 (75.0)   | 11 (73.3)   |             |

## Supplemental Table 2. Differential meta-topological anatomy in primary brain tumors

Top ten anatomical items that define each meta-topology in primary brain tumors.

| Factor | Anatomical item                    | Weight | Factor | Anatomical item                     | Weight |
|--------|------------------------------------|--------|--------|-------------------------------------|--------|
| 1      | Lateral ventricle – atrium         | 1.19   | 4      | Cerebral cortex                     | 1.58   |
|        | Ventricle wall – diffuse           | 1.17   |        | Cerebral subcortical white matter   | 1.57   |
|        | Cerebral gyral white matter        | 1.11   |        | Cerebral subgyral white matter      | 1.54   |
|        | Cerebral lobar white matter        | 1.11   |        | Cerebral gyral white matter         | 1.41   |
|        | Cerebral subgyral white matter     | 1.10   |        | Ventricle wall – focal              | 1.25   |
|        | Cerebral subcortical white matter  | 1.09   |        | Cerebral lobar white matter         | 1.07   |
|        | Cerebral cortex                    | 1.07   |        | Lateral ventricle – frontal horn    | 0.30   |
|        | Lateral ventricle – occipital horn | 0.45   |        | Subcentral gyrus                    | 0.09   |
|        | Subependymal corpus callosum       | 0.32   |        | Short insular gyri                  | 0.06   |
|        | Supramarginal gyrus                | 0.28   |        | Medial orbital gyrus                | 0.06   |
| 2      | Lateral ventricle – frontal horn   | 0.82   | 5      | Amygdala                            | 0.65   |
|        | Lateral ventricle – body           | 0.52   |        | Hippocampus                         | 0.62   |
|        | Ventricle wall – diffuse           | 0.52   |        | Long insular gyri                   | 0.61   |
|        | Cerebral lobar white matter        | 0.43   |        | Short insular gyri                  | 0.60   |
|        | Superior frontal gyrus – middle    | 0.34   |        | Lateral ventricle – temporal horn   | 0.57   |
|        | Superior frontal gyrus – anterior  | 0.34   |        | Temporal pole                       | 0.56   |
|        | Cerebral gyral white matter        | 0.34   |        | Parahippocampal gyrus               | 0.47   |
|        | Middle frontal gyrus – anterior    | 0.33   |        | Innominate substance                | 0.44   |
|        | Subependymal corpus callosum       | 0.32   |        | Extreme capsule                     | 0.43   |
|        | Superior frontal gyrus – posterior | 0.32   |        | External capsule                    | 0.41   |
| 3      | Lateral ventricle – temporal horn  | 0.86   | 6      | Cerebellar cortex                   | 1.37   |
|        | Ventricle wall – diffuse           | 0.53   |        | 4th ventricle – lateral recess      | 1.35   |
|        | Cerebral lobar white matter        | 0.52   |        | Cerebellar sublobular white matter  | 1.34   |
|        | Middle temporal gyrus – anterior   | 0.47   |        | Cerebellar subcortical white matter | 1.34   |
|        | Cerebral gyral white matter        | 0.47   |        | Cerebellar lobular white matter     | 1.33   |
|        | Superior temporal gyrus – anterior | 0.46   |        | Cerebellar lobar white matter       | 1.27   |
|        | Middle temporal gyrus – middle     | 0.45   |        | Vermis – nodulus                    | 0.52   |
|        | Cerebral subgyral white matter     | 0.44   |        | Vermis – centralis                  | 0.38   |
|        | Inferior temporal gyrus – anterior | 0.42   |        | 4th ventricle – fastigium           | 0.38   |
|        | Superior temporal gyrus – middle   | 0.42   |        | Vermis – culmen                     | 0.38   |

### Supplemental Table 3. Gyrality of primary brain tumors meta-topologies

The gyral character of each meta-topology, i.e., the number (*n*) and proportion (%) of tumors without gyral involvement (none), those involving one gyrus (unigyral), and tumors involving multiple gyri (multigyral).

|                     | Meta-topology |           |           |           |            |           |           |
|---------------------|---------------|-----------|-----------|-----------|------------|-----------|-----------|
|                     | Overall       | 1         | 2         | 3         | 4          | 5         | 6         |
| <b>n</b>            | 646           | 141       | 115       | 69        | 179        | 70        | 72        |
| <b>Gyrality (%)</b> |               |           |           |           |            |           |           |
| <b>none</b>         | 119 (18.4)    | 6 (4.3)   | 17 (14.8) | 3 (4.3)   | 0 (0.0)    | 22 (31.4) | 71 (98.6) |
| <b>unigyral</b>     | 285 (44.1)    | 70 (49.6) | 32 (27.8) | 27 (39.1) | 147 (82.1) | 9 (12.9)  | 0 (0.0)   |
| <b>multigyral</b>   | 242 (37.5)    | 65 (46.1) | 66 (57.4) | 39 (56.5) | 32 (17.9)  | 39 (55.7) | 1 (1.4)   |



#### Supplemental Table 4. Differential meta-topological anatomy in brain metastases

Top ten anatomical items that define meta-topologies 1 and 2 in brain metastases.

| <b>Factor</b> | <b>Anatomical item</b>              | <b>Weight</b> |
|---------------|-------------------------------------|---------------|
| <b>1</b>      | Cerebellar cortex                   | <b>2.18</b>   |
|               | Cerebellar subcortical white matter | <b>2.17</b>   |
|               | Cerebellar sublobular white matter  | <b>1.94</b>   |
|               | Cerebellar lobular white matter     | <b>1.49</b>   |
|               | Inferior semilunar / gracile lobule | <b>1.24</b>   |
|               | Superior semilunar lobule           | <b>0.47</b>   |
|               | Biventer lobule                     | <b>0.45</b>   |
|               | Anterior quadrangular lobule        | <b>0.19</b>   |
|               | Precentral gyrus                    | <b>0.16</b>   |
|               | Postcentral gyrus                   | <b>0.15</b>   |
| <b>2</b>      | Cerebral subcortical white matter   | <b>2.83</b>   |
|               | Cerebral cortex                     | <b>2.83</b>   |
|               | Cerebral subgyral white matter      | <b>2.30</b>   |
|               | Cerebral gyral white matter         | <b>1.03</b>   |
|               | Cerebral lobar white matter         | <b>0.37</b>   |
|               | Middle occipital gyrus              | <b>0.36</b>   |
|               | Precentral gyrus                    | <b>0.34</b>   |
|               | Superior frontal gyrus – posterior  | <b>0.32</b>   |
|               | Middle frontal gyrus – posterior    | <b>0.30</b>   |
|               | Ventricle wall – focal              | <b>0.26</b>   |

**Supplemental Table 5. Cohort characteristics in primary brain tumors stratified by dominant meta-topology**

The demographic, histopathologic, and clinical characteristics of the patients with primary brain tumors overall (A) and with glioblastoma (B) stratified by the dominant meta-topology. \*based on immunohistochemistry or PCR

| Meta-topology                           | Overall     | 1           | 2           | 3           | 4           | 5           | 6           |
|-----------------------------------------|-------------|-------------|-------------|-------------|-------------|-------------|-------------|
| <b>Primary brain tumors overall (A)</b> |             |             |             |             |             |             |             |
| <b>n</b>                                | 646         | 141         | 115         | 69          | 179         | 70          | 72          |
| <b>Sex (male)</b>                       | 402 (62.2)  | 88 (62.4)   | 64 (55.7)   | 48 (69.6)   | 119 (66.5)  | 39 (55.7)   | 44 (61.1)   |
| <b>Age (years)</b>                      | 50.1 (21.6) | 59.6 (15.7) | 54.0 (18.1) | 57.7 (18.9) | 49.4 (18.5) | 50.4 (21.0) | 19.1 (18.6) |
| <b>Karnofsky Performance Status</b>     | 80.0 (12.6) | 78.2 (11.5) | 75.8 (14.6) | 78.7 (12.5) | 84.8 (10.5) | 79.5 (12.1) | 80.4 (14.0) |
| <b>Modified Rankin Scale</b>            | 1.7 (1.0)   | 1.9 (0.9)   | 2.0 (1.0)   | 1.9 (1.0)   | 1.3 (0.8)   | 1.7 (0.9)   | 1.7 (1.0)   |
| <b>Resection (vs. biopsy)</b>           | 510 (78.9)  | 99 (70.2)   | 75 (65.2)   | 60 (87.0)   | 171 (95.5)  | 44 (62.9)   | 61 (84.7)   |
| <b>Chemotherapy</b>                     | 428 (69.1)  | 100 (74.6)  | 71 (64.5)   | 50 (73.5)   | 135 (78.0)  | 40 (60.6)   | 32 (47.1)   |
| <b>Radiotherapy</b>                     | 473 (76.2)  | 114 (84.4)  | 81 (73.6)   | 56 (82.4)   | 144 (82.8)  | 44 (66.7)   | 34 (50.0)   |
| <b>MIB1</b>                             | 25.0 (20.6) | 28.0 (18.0) | 24.2 (18.2) | 29.6 (21.4) | 26.5 (22.1) | 16.3 (17.0) | 21.4 (24.3) |
| <b>1p19q co-deletion</b>                | 43 (31.4)   | 3 (21.4)    | 12 (52.2)   | 0 (0.0)     | 25 (34.7)   | 3 (13.6)    | 0 (0.0)     |
| <b>IDH1 mutation*</b>                   | 88 (19.6)   | 8 (7.5)     | 17 (19.5)   | 1 (2.0)     | 53 (37.6)   | 9 (20.5)    | 0 (0.0)     |
| <b>MGMT promoter methylation</b>        | 95 (38.6)   | 28 (37.3)   | 18 (37.5)   | 17 (47.2)   | 24 (38.1)   | 7 (36.8)    | 1 (20.0)    |
| <b>Glioblastoma (B)</b>                 |             |             |             |             |             |             |             |
| <b>n</b>                                | 401         | 121         | 76          | 59          | 91          | 27          | 5           |
| <b>Sex (male)</b>                       | 244 (64.4)  | 77 (63.6)   | 45 (59.2)   | 42 (71.2)   | 62 (68.1)   | 14 (51.9)   | 4 (80.0)    |
| <b>Age (years)</b>                      | 60.8 (14.2) | 62.7 (12.3) | 60.3 (14.7) | 62.4 (13.7) | 58.8 (15.4) | 62.2 (8.6)  | 33.4 (25.1) |
| <b>Karnofsky Performance Status</b>     | 76.9 (13.2) | 77.4 (12.0) | 72.0 (14.7) | 77.9 (12.8) | 81.2 (11.4) | 74.8 (12.2) | 60.0 (27.1) |
| <b>Modified Rankin Scale</b>            | 1.9 (1.0)   | 2.0 (1.0)   | 2.2 (1.1)   | 1.9 (1.0)   | 1.6 (0.9)   | 2.1 (0.9)   | 3.2 (1.3)   |
| <b>Resection (vs. biopsy)</b>           | 285 (75.2)  | 85 (70.2)   | 47 (61.8)   | 50 (84.7)   | 87 (95.6)   | 15 (55.6)   | 1 (20.0)    |
| <b>Chemotherapy</b>                     | 269 (73.7)  | 86 (74.1)   | 47 (64.4)   | 45 (77.6)   | 76 (85.4)   | 13 (52.0)   | 2 (50.0)    |
| <b>Radiotherapy</b>                     | 311 (85.0)  | 100 (85.5)  | 56 (76.7)   | 51 (87.9)   | 81 (91.0)   | 21 (84.0)   | 2 (50.0)    |
| <b>MIB1</b>                             | 32.5 (19.2) | 30.6 (17.9) | 30.0 (17.2) | 32.8 (20.9) | 36.8 (20.6) | 31.7 (19.0) | 40.6 (26.7) |
| <b>1p19q co-deletion</b>                | 2 (9.1)     | 0 (0.0)     | 1 (50.0)    | 0 (0.0)     | 1 (14.3)    | 0 (0.0)     | 0 (-)       |
| <b>IDH1 mutation*</b>                   | 10 (3.4)    | 3 (3.2)     | 4 (6.5)     | 0 (0.0)     | 3 (4.1)     | 0 (0.0)     | 0 (0.0)     |
| <b>MGMT promoter methylation</b>        | 82 (38.0)   | 28 (38.4)   | 14 (34.1)   | 17 (48.6)   | 17 (33.3)   | 6 (42.9)    | 0 (0.0)     |

**Supplemental Table 6. Cohort characteristics in brain metastases stratified by dominant meta-topology**

The demographic, histopathologic, and clinical characteristics of the patients with brain metastases overall (A) and lung cancer brain metastases (B) stratified by the dominant meta-topology.

| Meta-topology                       | Metastases overall (A) |             |             | Lung cancer metastases (B) |             |             |
|-------------------------------------|------------------------|-------------|-------------|----------------------------|-------------|-------------|
|                                     | Overall                | 1           | 2           | Overall                    | 1           | 2           |
| <b>n</b>                            | 290                    | 76          | 214         | 141                        | 45          | 96          |
| <b>Gender (m)</b>                   | 149 (51.4)             | 41 (53.9)   | 108 (50.5)  | 77 (54.6)                  | 26 (57.8)   | 51 (53.1)   |
| <b>Age (years)</b>                  | 60.7 (11.9)            | 58.5 (11.9) | 61.5 (11.8) | 61.4 (9.9)                 | 58.7 (9.7)  | 62.6 (9.8)  |
| <b>Karnofsky Performance Status</b> | 76.9 (11.6)            | 77.5 (10.5) | 76.7 (12.0) | 77.7 (11.0)                | 78.9 (10.3) | 77.2 (11.4) |
| <b>Modified Rankin Scale</b>        | 2.0 (0.9)              | 1.9 (0.8)   | 2.0 (0.9)   | 1.9 (0.8)                  | 1.8 (0.7)   | 1.9 (0.9)   |
| <b>Resection (vs. biopsy)</b>       | 277 (95.5)             | 72 (94.7)   | 205 (95.8)  | 136 (96.5)                 | 43 (95.6)   | 93 (96.9)   |
| <b>Chemotherapy</b>                 | 175 (62.3)             | 49 (68.1)   | 126 (60.3)  | 94 (69.1)                  | 32 (72.7)   | 62 (67.4)   |
| <b>Radiotherapy</b>                 | 255 (89.2)             | 67 (90.5)   | 188 (88.7)  | 128 (92.1)                 | 41 (93.2)   | 87 (91.6)   |

**Supplemental Table 7. Pairwise comparison of survival curves stratified by meta-topologies in primary brain tumor overall and glioblastoma**

Evidence for a difference between the meta-topology-stratified survival curves in (A) primary brain tumors overall and in (B) glioblastoma according to pairwise comparison with the log-rank test and Bonferoni-Holm correction for multiple testing. \*\*\**very strong evidence* ( $p < 0.001$ ), \*\**strong evidence* ( $p < 0.01$ ), \**evidence* ( $p < 0.05$ ), +*weak evidence* ( $p < 0.1$ ).

| Meta-topology                           | 1          | 2          | 3          | 4          | 5          |
|-----------------------------------------|------------|------------|------------|------------|------------|
| <b>(A) Primary brain tumors overall</b> |            |            |            |            |            |
| 2                                       | 0.041*     | NA         | NA         | NA         | NA         |
| 3                                       | 0.68       | 0.031*     | NA         | NA         | NA         |
| 4                                       | <0.0001*** | 0.0085**   | <0.0001*** | NA         | NA         |
| 5                                       | 0.013*     | 0.51       | 0.0092**   | 0.11       | NA         |
| 6                                       | <0.0001*** | <0.0001*** | <0.0001*** | <0.0001*** | <0.0001*** |
| <b>(B) Glioblastoma</b>                 |            |            |            |            |            |
| 2                                       | 0.58       | NA         | NA         | NA         | NA         |
| 3                                       | 0.81       | 0.76       | NA         | NA         | NA         |
| 4                                       | 0.026*     | 0.0076**   | 0.03*      | NA         | NA         |
| 5                                       | 0.4        | 0.76       | 0.4        | 0.0075**   | NA         |
| 6                                       | 0.43       | 0.75       | 0.4        | 0.074+     | 0.63       |
